# Supplementary material
Source: PubMed Central journal article supplement (PMC6733651)
Supplement: NIHMS1528504-supplement-1.pdf [file NIHMS1528504-supplement-1.pdf]

## Risk-Based Pathway for Outpatient Penicillin Allergy Evaluations

Kimberly G. Blumenthal, MD, MSc<sup>1,2,3</sup>

Emily M. Huebner<sup>2</sup>

Xiaoqing Fu, MS<sup>2,3</sup>

Yu Li, MS<sup>4</sup>

Gita Bhattacharya<sup>2</sup>

Amy S. Levin, MD<sup>2</sup>

Christian M. Mancini<sup>2,3</sup>

Benjamin R. Slawski, NP<sup>2</sup>

Aleena Banerji, MD<sup>1,2</sup>

<sup>1</sup>Harvard Medical School, Boston, MA

<sup>2</sup>Division of Rheumatology, Allergy, and Immunology, Department of Medicine, Massachusetts General Hospital, Boston, MA

<sup>3</sup>Mongan Institute, Massachusetts General Hospital, Boston, MA

<sup>4</sup>University of Pittsburgh School of Medicine, Pittsburgh, PA

**Corresponding Author:** Kimberly G. Blumenthal, MD, MSc, Massachusetts General Hospital, The Mongan Institute, 100 Cambridge Street, 16th Floor, Boston, MA 02114, p-(617) 726-3850, f- (617) 724-7441, kblumenthal@mgh.harvard.edu

### **Contents:**

Supplement: Table (1)

**Table E1.** Predictors of adverse drug reactions and hypersensitivity reactions

| <b>Adverse Drug Reactions</b>               | <b>Odds ratio [95% CI]*</b> | <b>P-value</b> |
|---------------------------------------------|-----------------------------|----------------|
| Age                                         | 1.01 [0.99, 1.03]           | 0.48           |
| Female                                      | 2.67 [1.00, 7.10]           | 0.05           |
| White                                       | 1.28 [0.46, 3.55]           | 0.64           |
| Number of other drug allergies              |                             |                |
| 1                                           | 2.43 [0.89, 6.60]           | 0.08           |
| 2                                           | 1.31 [0.36, 4.73]           | 0.68           |
| ≥ 3                                         | 3.74 [1.46, 9.57]           | 0.006          |
| Incident reaction 1 year ago or less        | 2.19 [0.73, 6.52]           | 0.16           |
| Aminopenicillin as penicillin culprit       | 0.87 [0.38, 2.01]           | 0.74           |
| Respiratory symptoms with incident reaction | 1.28 [0.35, 4.67]           | 0.71           |
| Angioedema with incident reaction           | 1.14 [0.41, 3.23]           | 0.80           |
| Unknown incident reaction                   | 0.55 [0.15, 1.99]           | 0.37           |
| Evaluation method direct challenge          | 1.23 [0.50, 3.05]           | 0.65           |
| <b>Hypersensitivity Reactions</b>           | <b>Odds ratio [95% CI]*</b> | <b>P-value</b> |
| Age                                         | 1.00 [0.98, 1.03]           | 0.81           |
| Female                                      | 2.91 [0.83, 10.26]          | 0.10           |
| White                                       | 2.33 [0.51, 10.80]          | 0.28           |
| Number of other drug allergies              |                             |                |
| 1                                           | 3.85 [1.12, 13.27]          | 0.03           |
| 2                                           | 1.79 [0.38, 8.53]           | 0.47           |
| ≥ 3                                         | 3.17 [0.91, 11.11]          | 0.07           |
| Incident reaction 1 year ago or less        | 2.64 [0.77, 9.12]           | 0.12           |
| Aminopenicillin as penicillin culprit       | 1.07 [0.40, 2.88]           | 0.90           |
| Respiratory symptoms with incident reaction | 2.82 [0.74, 10.73]          | 0.13           |
| Angioedema with incident reaction           | 1.23 [0.33, 4.57]           | 0.76           |
| Unknown incident reaction                   | 0.30 [0.04, 2.42]           | 0.26           |
| Evaluation method direct challenge          | 1.73 [0.59, 5.06]           | 0.32           |
| <b>Non-Hypersensitivity Reactions (side</b> | <b>Odds ratio [95% CI]*</b> | <b>P-value</b> |

| <b>effects and subjective symptoms)</b> |                    |      |
|-----------------------------------------|--------------------|------|
| Age                                     | 1.01 [0.98, 1.04]  | 0.44 |
| Female                                  | 2.33 [0.50, 10.77] | 0.28 |
| White                                   | 0.70 [0.19, 2.67]  | 0.60 |
| Number of other drug allergies          |                    |      |
| 1                                       | 0.91 [0.15, 5.66]  | 0.92 |
| 2                                       | 0.69 [0.07, 6.96]  | 0.75 |
| ≥ 3                                     | 3.76 [0.95, 14.96] | 0.06 |
| Incident reaction 1 year ago or less    | 1.19 [0.14, 10.25] | 0.88 |
| Aminopenicillin as penicillin culprit   | 0.57 [0.12, 2.71]  | 0.48 |
| Angioedema with incident reaction       | 1.05 [0.22, 5.07]  | 0.95 |
| Unknown incident reaction               | 1.05 [0.21, 5.18]  | 0.95 |
| Evaluation method direct challenge      | 0.72 [0.15, 3.44]  | 0.68 |

\*Multivariable logistic regression model results
